# Supplementary material for: Monkeypox (MPOX)-Related Knowledge and Vaccination Hesitancy in Non-Endemic Countries: Concise Literature Review
Source: MDPI journal article supplement (doi:10.3390/vaccines11020229), 2023-01-19
Supplement: s1 [file s1]

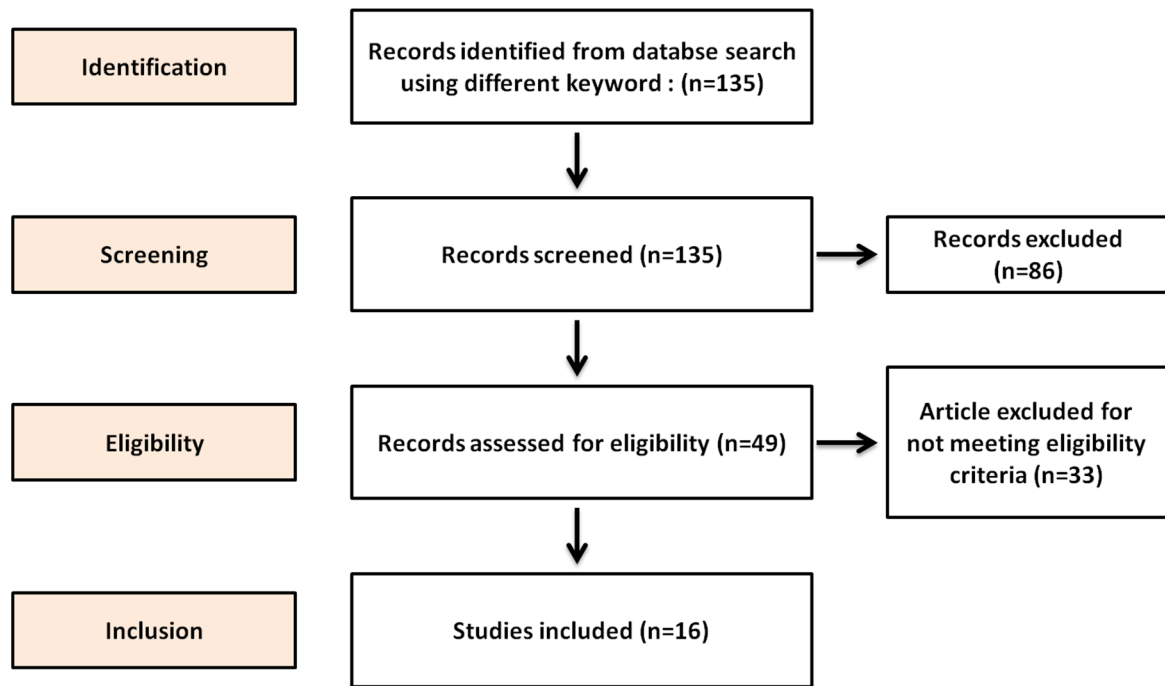

**Figure S1.** Flow diagram of the study selection process

**Table S1.** Search strategies

| Search | Formula                                             | Number of studies |
|--------|-----------------------------------------------------|-------------------|
| 1      | monkeypox* knowledge*[Title/Abstract]               | 8                 |
| 2      | monkeypox* awareness *[Title/Abstract]              | 13                |
| 3      | monkeypox* attitude *[Title/Abstract]               | 3                 |
| 4      | monkeypox *vaccine * hesitancy [Title/Abstract]     | 48                |
| 5      | monkeypox * vaccine acceptance[Title/Abstract]      | 15                |
| 6      | monkeypox * intention to vaccine * [Title/Abstract] | 48                |
